# Supplementary material for: The effects of protein crowding in bacterial photosynthetic membranes on the flow of quinone redox species between the photochemical reaction center and the ubiquinol-cytochrome c2 oxidoreductase
Source: Royal Society of Chemistry journal article supplement (doi:10.1039/c1mt00034a), 2011-01-01

## Modeling of Glycophorin A on *Rba. sphaeroides* bc<sub>1</sub> complex

Glycophorin A uses a GxxxG motif to mediate binding between a pair of helices

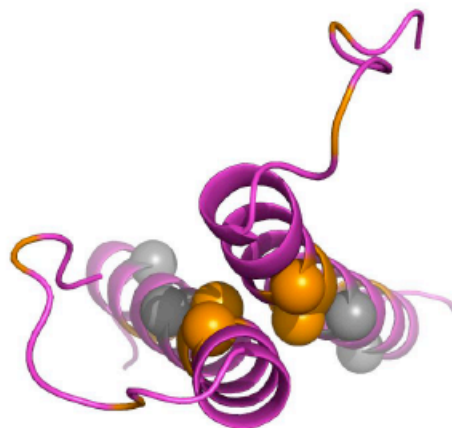

GpA and Subunit IV both contain a small-xxx-small motif in the TM spanning region of the helix. The site previously identified on the ISP has a corresponding site.

```
GPA  VQLAHHFSEPEITLIIFGV MAGVIGTILLISYGIRRLIKK  
SIV      YRYRLGGFASGALLALALAGIFSTGNFGGS  
ISP      GTRRDFLYYATAGAGAVATGAAVWPLINQM
```

This forms the basis for the model in which Subunit IV interacts with the FeS protein (ISP). If Subunit IV is mimicked with the NMR structure of GpA and bound at the ISP site, the following is obtained:

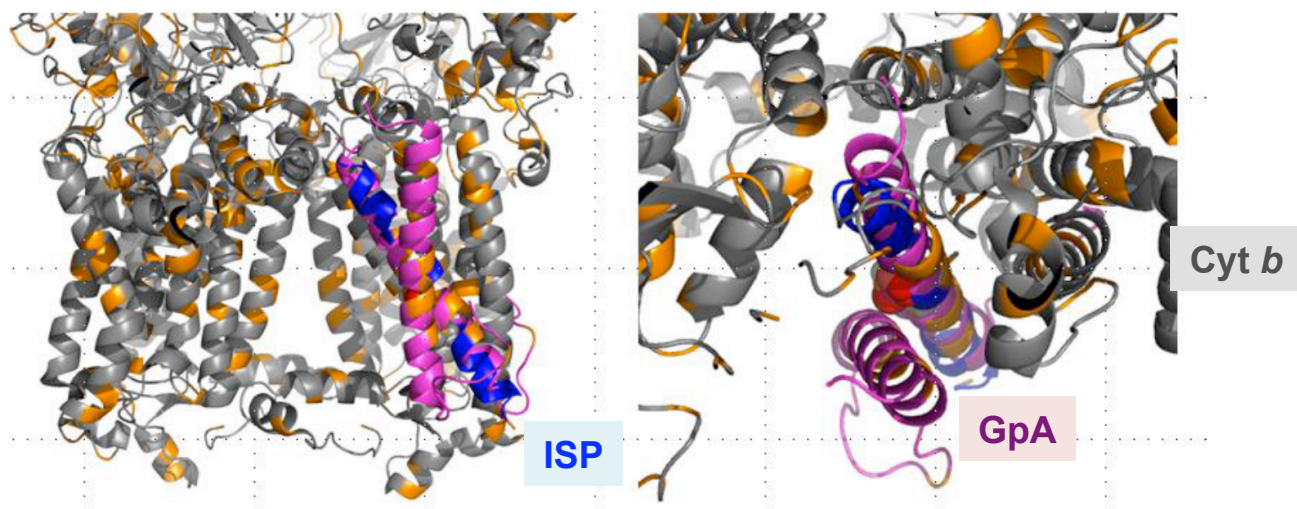

Supplement: c1mt00034a.pdf [file c1mt00034a.pdf]
